# Severe airport sanitarian control could slow down the spreading of COVID-19 pandemics in Brazil

Sérvio Pontes Ribeiro <sup>Corresp., 1</sup>, Wesley Dáttilo <sup>2</sup>, Alcides Castro e Silva <sup>3</sup>, Alexandre Barbosa Reis <sup>4</sup>, Aristóteles Góes-Neto <sup>Corresp., 5</sup>, Luiz Carlos Junior Alcantara <sup>6</sup>, Marta Giovanetti <sup>6</sup>, Wendel Coura-Vital <sup>7</sup>, Geraldo Wilson Fernandes <sup>7</sup>, Vasco Ariston C Azevedo <sup>7</sup>

<sup>1</sup> Núcleo de Pesquisas em Ciências Biológicas, Universidade Federal de Ouro Preto, Ouro Preto, Minas Gerais, Brazil

<sup>2</sup> Red de Ecoetología, Instituto de Ecología AC, Xalapa, Vera Cruz, Mexico

<sup>3</sup> Laboratório da Ciência da Complexidade, Departamento de Física, Universidade Federal de Ouro Preto, Ouro Preto, Minas Gerais, Brazil

<sup>4</sup> Laboratório de Imunopatologia, Departamento de Análises Clínicas, Escola de Farmácia, Universidade Federal de Ouro Preto, Ouro Preto, Minas Gerais, Brazil

<sup>5</sup> Laboratório de Biologia Molecular e Computacional de Fungos, Departamento de Microbiologia, Instituto de Ciências Biológicas, Universidade Federal de Minas Gerais, Belo Horizonte, Minas Gerais, Brazil

<sup>6</sup> Laboratório de Flavivírus, Instituto Oswaldo Cruz, Fundação Oswaldo Cruz, Rio de Janeiro, Rio de Janeiro, Brazil

<sup>7</sup> Departamento de Genética, Ecologia & Evolução/ICB, Universidade Federal de Minas Gerais, Belo Horizonte, Minas Gerais, Brazil

Corresponding Authors: Sérvio Pontes Ribeiro, Aristóteles Góes-Neto  
Email address: [spribeiro@ufop.edu.br](mailto:spribeiro@ufop.edu.br), [arigoesneto@icb.ufmg.br](mailto:arigoesneto@icb.ufmg.br)

**Background.** We investigated a likely scenario of COVID-19 spreading in Brazil through the complex airport network of the country, for the 90 days after the first national occurrence of the disease. After the confirmation of the first imported cases, the lack of a proper airport entrance control resulted in the infection spreading in a manner directly proportional to the amount of flights reaching each city, following first occurrence of the virus coming from abroad. **Methodology.** We developed a SIR (Susceptible-Infected-Recovered) model divided in a metapopulation structure, where cities with airports were demes connected by the number of flights. Subsequently, we further explored the role of Manaus airport for a rapid entrance of the pandemic into indigenous territories situated in remote places of the Amazon region. **Results.** The expansion of the SARS-CoV-2 virus between cities was fast, directly proportional to the airport closeness centrality within the Brazilian air transportation network. There was a clear pattern in the expansion of the pandemic, with a stiff exponential expansion of cases for all cities. The more an airport showed closeness centrality, the greater was its vulnerability to SARS-CoV-2. **Conclusions.** We discussed the weak pandemic control performance of Brazil in comparison with other tropical, developing countries, namely India and Nigeria. Finally, we proposed measures for containing virus spreading taking into consideration the scenario of high poverty.

## Severe airport sanitarian control could slow down the spreading of COVID-19 pandemics in Brazil

Sérvio Pontes Ribeiro <sup>\*1,2,3</sup>, Wesley Dáttilo <sup>4</sup>, Alcides Castro e Silva <sup>5</sup>, Alexandre Barbosa Reis <sup>1,6</sup>, Aristóteles Góes-Neto <sup>7</sup>, Luiz Carlos Junior Alcantara <sup>8,9</sup>, Marta Giovanetti <sup>8,9</sup>, Wendel Coura-Vital <sup>10</sup>, Geraldo Wilson Fernandes <sup>10,13</sup>, Vasco Ariston C. Azevedo <sup>10,11,12</sup>.

1 - Núcleo de Pesquisas em Ciências Biológicas, Universidade Federal de Ouro Preto, Minas Gerais, Brazil

2 - Laboratório de Ecohealth, Ecologia de Insetos de Dossel e Sucessão Natural, Instituto de Ciências Exatas e Biológicas, Universidade Federal de Ouro Preto, Minas Gerais, Brazil.

3 – Laboratório de Fisiologia de insetos hematófagos, Departamento de Parasitologia, ICB-Universidade Federal de Minas Gerais, Brazil

4 - Red de Ecoetología, Instituto de Ecología AC, Xalapa, Veracruz, Mexico.

5 – Laboratório da ciência da complexidade, Departamento de Física, Universidade Federal de Ouro Preto, Ouro Preto, Minas Gerais, Brazil.

6 - Laboratório de Imunopatologia, Departamento de Análises Clínicas, Escola de Farmácia, UFOP, Ouro Preto, Minas Gerais, Brazil.

7 - Laboratório de Biologia Molecular e Computacional de Fungos, Departamento de Microbiologia, Instituto de Ciências Biológicas, Universidade Federal de Minas Gerais (UFMG), Belo Horizonte, Minas Gerais, Brazil.

8 - Laboratório de Flavivírus, Instituto Oswaldo Cruz, Fundação Oswaldo Cruz, Rio de Janeiro, Brazil.

9 - Laboratório de Genética Celular e Molecular, Instituto de Ciências Biológicas, Universidade Federal de Minas Gerais, Belo Horizonte, Minas Gerais, Brazil.

10 - Departamento de Genética, Ecologia & Evolução/ICB, Universidade Federal de Minas Gerais, Belo Horizonte, Minas Gerais, Brazil.

11 - DVM, M.Sc, Ph.D, Livre docente, Professor Titular, F.BAS

13 - Titular Member of the Brazilian Academy of Sciences

### Corresponding Author:

Sérvio Ribeiro

ICEB, Campus Morro do Cruzeiro, Ouro Preto, Minas Gerais, 35400-000, Brazil.

Email address: [serviopr@gmail.com](mailto:serviopr@gmail.com)

## 1 **Abstract**

2 **Background.** We investigated a likely scenario of COVID-19 spreading in Brazil  
3 through the complex airport network of the country, for the 90 days after the first  
4 national occurrence of the disease. After the confirmation of the first imported cases, the  
5 lack of a proper airport entrance control resulted in the infection spreading in a manner  
6 directly proportional to the amount of flights reaching each city, following first  
7 occurrence of the virus coming from abroad.

8 **Methodology.** We developed a SIR (Susceptible-Infected-Recovered) model divided in  
9 a metapopulation structure, where cities with airports were demes connected by the  
10 number of flights. Subsequently, we further explored the role of Manaus airport for a  
11 rapid entrance of the pandemic into indigenous territories situated in remote places of  
12 the Amazon region.

13 **Results.** The expansion of the SARS-CoV-2 virus between cities was fast, directly  
14 proportional to the airport closeness centrality within the Brazilian air transportation  
15 network. There was a clear pattern in the expansion of the pandemic, with a stiff  
16 exponential expansion of cases for all cities. The more an airport showed closeness  
17 centrality, the greater was its vulnerability to SARS-CoV-2.

18 **Conclusions.** We discussed the weak pandemic control performance of Brazil in  
19 comparison with other tropical, developing countries, namely India and Nigeria. Finally,  
20 we proposed measures for containing virus spreading taking into consideration the  
21 scenario of high poverty.

22 **Key-words** – SARS-Cov-2 pandemic; SIR model; metapopulation dynamics; Amazonia;  
23 Indigenous people; one-Ecohealth.

24

## 25 **Introduction**

26 In the last few weeks, the new disease COVID-19 has been spreading rapidly around  
27 the world mainly due to stealth transmission, which started in China at the end of 2019.  
28 Large continental countries are likely to be very vulnerable to the occurrence of  
29 pandemics (Morse et al. 2012). While the dissemination dynamics have varied between  
30 regions, country sanitary policies play a key role in it. For instance, two very large  
31 developing countries, India and Brazil, have a very different epidemical pattern. On  
32 March 18<sup>th</sup>, India had 137 cases and Brazil 621, as recorded in the Brazilian Ministry of  
33 Health and John Hopkins monitoring sites dedicated to SARS-CoV-2 and COVID-19.  
34 From 17<sup>th</sup> to 18<sup>th</sup> March, Brazil had an increase of 31% in one day, with only four  
35 capitals exhibiting community transmission, which was the same to India. However, a  
36 very distinct pattern in the ascending starting point for the reported disease exponential  
37 curve was observed in each country. By enlarging the comparison to another  
38 developing tropical country in the Southern Hemisphere (thus in the same season), we

39 selected Nigeria, since it was the first country to detect a COVID-19 case in Africa.  
40 Nigeria displayed less than 10 confirmed cases during the same period of time.  
41 Furthermore, Nigeria has a population (206 million) similar to that of Brazil (209 million).

42 Both India and Nigeria claim they imposed severe entrance control, and close  
43 following up of each confirmed case, as well as their living and working area, and  
44 people in contact with them. In Brazil, the Ministry of Health has developed a good  
45 monitoring network and a comprehensive preparation of the health system for the worst-  
46 case scenario. Nonetheless, apparently, the decisions from the Ministry of Health did  
47 not cover airport control, and only on March 19<sup>th</sup>, eventually too late, the government  
48 decided to control the airports, avoiding the entrance of people coming from Europe or  
49 Asia. Hence, the entrance of diseased people in Brazil has been occurring with no  
50 control, at least until the aforementioned date. Moreover, after confirming that a person  
51 is infected with SARS-CoV-2, his/her monitoring is initiated but there is no monitoring of  
52 his/her living network.

53 For pandemic situations, such as that with which we are living with SARS-CoV-2,  
54 the classical algebraic ecological models of species population growth from Verhulst,  
55 and species interaction models from Lotka-Volterra, are theoretical frameworks capable  
56 to describe the phenomenon and to propose actions to stop it (Pianka 2000). In many  
57 aspects social isolation is a way to severely reduce carrying capacity, i.e., the resources  
58 available for the virus dissemination. This is the best action for within-city pandemic  
59 spreading of coronavirus (Hellewell et al. 2020), since the main form of transmission is  
60 direct contact between people or by contact with fomite, mainly in closed environments,  
61 such as classrooms, offices, etc. (Rothe et al., 2019; Bedford et al., 2020). Regardless  
62 of virulence, for a highly contagious virus such as SARS-CoV-2, the occurrence of the  
63 first case in a nation will result in a strongly and nearly uncontrollable exponential  
64 growth curve, depending only on the number of encounters between infected and  
65 susceptible people, and fuelled by a high  $H_0$  (the number of people one infected person  
66 will infect).

67 On the other hand, the dynamics of disease spreading among cities are entirely  
68 distinct. In this work, we present an epidemiological model describing the free entrance  
69 of people coming from two highly infected countries with close links to Brazil: Italy and  
70 Spain. We showed how SARS-CoV-2 spreads into the Brazilian cities by the  
71 international airports, and then to other, less internationally connected cities, through  
72 the Brazilian airport network. For exploring the dynamics of a continent size, nationwide  
73 spreading of SARS-CoV-2, as it is the case of Brazil, we assumed cities connected by  
74 airports formed a metapopulation structure.

75 Each person in a city was taken as a component of a superorganism, i.e., an  
76 interdependent entity where living individuals are not biologically independent between  
77 them in various subtle ways. By doing so, we dealt with cities as the sampling units, not  
78 the people. Flights coming from foreign countries with COVID-19 (namely Spain and



79 Italy for this article) represent the probability of an external invasion of infection in each  
80 city. Additionally, we also further explored the vulnerability of the Amazon region,  
81 especially of those remote towns where indigenous and traditional communities  
82 predominate.

83

## 84 **Materials & Methods**

85 In order to describe the pattern of air transportation and its role in the spreading of the  
86 disease, we built a SIR (Susceptible-Infected-Recovered) model (Hethcote 1989;  
87 Anderson 1991) split amongst the cities that are interconnected by flights. In this model,  
88 the population size inside each city is irrelevant, as well as when the collective infection  
89 stage was reached. Thus, we assumed that the city was fully infected and became  
90 infectious to the whole system, and, therefore, became a source and not a sink of  
91 infection events. Hence, the SIR model started having cities with only susceptible  
92 events. Infected events only appeared by migration, i.e. travelers only from Italy and  
93 Spain, for sake of simplicity and proximity to the facts.

94 After the first occurrence is registered in the country, infected events started to  
95 spread through the national airlines.

96 We used a modified version of the SIR model, which took into account the  
97 topology of how the cities-demes were linked by domestic flights. In the SIR original  
98 model, the infection of susceptible cities occurs by probability  $\beta$  of a healthy being ( $S$ )  
99 encounters an infected one ( $I$ ). Conversely, the model has a probability of an infected  
100 one get recovered ( $R$ ) given by a parameter  $\gamma$ . Analytically:

101

$$102 \quad S_{t+1} = S_t - \frac{\beta}{N} S_t I_t$$

103

$$104 \quad I_{t+1} = I_t + \frac{\beta}{N} S_t I_t - \gamma I_t$$

105

$$106 \quad R_{t+1} = R_t + \gamma I_t$$

107

108 where the indexes  $t$  and  $t+1$  represent the present time and the next time, respectively,  
109 and  $N=S+I+R$  is the total constant population. In this work, we proposed two  
110 modifications of the SIR model. The first one is related to the fact that we considered all  
111 Brazilian cities that have an airport. Thus, we had  $S^i$ ,  $I^i$ , and  $R^i$  where  $i$  was a given city.  
112 In our case study,  $1 \leq i \leq 154$ . Another important modification was that related to the  
113 connections among airports or cities. Using ANAC data, it was possible to track all the  
114 domestic flights in Brazil (Figure 1): <https://www.anac.gov.br/assuntos/dados-e-estatisticas/historico-de-voos>

115

116

118 The modified version of SIR model is then described as follows:

119

$$120 \quad S_{t+1}^i = S_t^i - \frac{\beta}{N} S_t^i (I_t^i + \bar{I}_t^i)$$

121

$$122 \quad I_{t+1}^i = I_t^i + \frac{\beta}{N} S_t^i (I_t^i + \bar{I}_t^i) - \gamma (I_t^i + \bar{I}_t^i)$$

123

$$124 \quad R_{t+1}^i = R_t^i + \gamma (I_t^i + \bar{I}_t^i),$$

125

126 where the upper index  $i$  indicates the city, and  $t$  the time. The term  $\bar{I}_t^i$  represents the

127 infection added to the  $i^{\text{th}}$  city due to traveling diseases, and it is calculated as follow:

128

$$129 \quad \bar{I}_t^i = \alpha \sum_{j=0}^{154} k_{i,j} I_j$$

130

131 where  $k_{ij}$  is the number of flights departing at city  $i$  and arriving at city  $j$ , and  $\alpha$  is a newly  
132 introduced parameter, which represents the fraction of traveling infected population. For  
133 the time, we estimated 90 days for the disease expansion and assumed  $\gamma$  as 0, in other  
134 words, no recovery. Despite the artificiality of this assumption, we considered that the  
135 amount of people still to be infected is larger than those recovered and, thus, becoming  
136 resistant, which makes the resistance irrelevant to our output. The model was  
137 developed in C and is available as Supplementary Material 1 (and the database as  
138 Supplementary Material 2). In addition, we also used a linear model to test whether  
139 those cities with higher airport closeness centrality (i.e., important cities for connecting  
140 different cities within the Brazilian air transportation network) were more vulnerable to  
141 SARS-CoV-2 dissemination.

142

## 143 Results

144 The expansion of the SARS-CoV-2 virus between cities was fast, directly proportional to  
145 the airport closeness centrality within the Brazilian air transportation network. The  
146 disease spread from São Paulo and Rio de Janeiro to the next node-city by the flight  
147 network, and in 90 days virtually all the cities with airport(s) were reached, although it  
148 occurred with a distinct intensity (Figure 2, Supplementary Material 3). There was a  
149 clear pattern in the expansion of the pandemic, with a stiff exponential expansion of  
150 cases (measured as the cumulative percentage of infected people per city) for all the  
151 cities. On average, the model showed an ascendant curve starting at day 50 (around 15  
152 April), with the most connected cities starting their ascendant curve just after 25 days,  
153 and the most isolated ones from day 75 (10th May; Figure 3A). Looking at the daily

154 increment rates, it is clear a first and high peak of infections in the hub cities, happening  
155 around 50 days and, starting from 75 days, a new peripheric peak (Figure 3B).

156 The first ten cities to ascend infection rates (São Paulo, Rio de Janeiro, Salvador,  
157 Recife, Brasília, Fortaleza, Belo Horizonte, Porto Alegre, Curitiba, and Florianópolis) will  
158 actually reach this point about the same time, which is a concerning pattern for the  
159 saturation of the public health services. Also, this peak in those cities will saturate all the  
160 best hospitals in the country simultaneously.

161 Therefore, we defined the average proportion of infected people for the 90 days  
162 as a measure of vulnerability to COVID-19 dissemination. Henceforth, we found that  
163 more an airport shows closeness centrality within the air transportation network, the  
164 greater was its vulnerability to disease transmission (Figure 4). This scenario confirmed  
165 the importance of a city connecting different cities within the Brazilian air transportation  
166 network and, thus, acting as the main driver for the pandemic spreading across the  
167 country.

168

### 169 *Consequences for the Amazonian cities and indigenous people*

170 Herein we showed that an uncontrolled complex airport system made a whole  
171 country vulnerable in few weeks, allowing the virus to reach the most distant and remote  
172 places, in the most pessimistic scenario. According to our model, any connected city will  
173 be infected after three months. As the number of flights arriving in a city is the driver for  
174 the proportion of infected people, Manaus, which is a relevant regional clustering, was  
175 infected sooner. Indeed, on the 17<sup>th</sup> of March, Manaus was the first Amazonian city with  
176 confirmed cases (without community transmission yet), and it is a node that is one or  
177 two steps to all the Amazonian cities. Thus, according to our model, Manaus may reach  
178 1% of the infected population by the 44<sup>th</sup> day, while, for instance, the far west  
179 Amazonian Tabatinga will take 61 days to reach the same 1% of the population  
180 infected. By day 60, Manaus may have an average of 50% of its population infected if  
181 nothing is be done to prevent it. Tabatinga may also reach the aforementioned value by  
182 day 78, if nothing is be done to avoid it. To sum up, within 46 days all the Amazonian  
183 cities will have 1% of their population infected and a mean of 50% by day 70.

184

## 185 **Discussion**

186 Brazil has failed to contain COVID-19 in airports and failed to closely monitor those  
187 infected people coming from abroad, as well as their living network. One main reason  
188 for this is the difficult logistics required to produce such control in a continental country,  
189 such as Brazil, which has a complex national flight network. According to the Brazilian  
190 Airport Authority, Brazil has the second-largest flight network in the world (just after the  
191 USA), with a total of 154 airports registered to commercial flights of which 31 are  
192 considered international. In comparison, airport control may be much easier to set up in  
193 Nigeria (31 airports of which only five are international). However, with a population 6.4

194 times higher than Brazil, India, in turn, has a similar sized airport network to Brazil,  
195 harboring a total of 123 airports of which 34 are considered international.

196 Nevertheless, the situation of COVID-19 in India is currently much milder than in  
197 Brazil, and it is hard to blame the complexity of the airport networks for the contrasting  
198 exponential curve of these two countries. In 20 days from the first infection in Brazil  
199 (February 26<sup>th</sup>) against 47 days after the first Indian case (January 30<sup>th</sup>), Brazil already  
200 had 5.4 more confirmed cases than India. Clearly one country is doing much better in  
201 preventing the entrance of cases and the spreading of the disease by controlling  
202 infected citizens. Considering the high probability of a synchronizing SARS-Cov-2 high  
203 spreading in various capitals, the country may face a quick health service collapse.

204 Besides the within-city pattern of virus spreading, one must take into account the  
205 pattern of dispersion between cities after the virus has invaded. Additionally, for the  
206 Brazilian case, one cannot ignore that, eventually, the occurrence of the first case may  
207 have occurred nearly one month before official records, during the carnival period. This  
208 is the largest popular street party on the planet, with 6.4 million people in Rio de  
209 Janeiro, and 16.3 million in Salvador where the Brazilian Ministry of Tourism revealed  
210 that 86,000 foreigners from France, Germany, Spain, Italy, UK, and the US had visited.  
211 Considering a disease with so many asymptomatic cases, it could have invaded before  
212 but, with the lack of an early warning and airport control, one will never know exactly if  
213 this happened. As airport control might have been even more lax in small airports, it  
214 might unavoidably result in strengthening of the capability of an infected city to infect the  
215 next new one, if no public policy is adopted.

216 Without a social isolation policy, virus propagation may result in chaotic  
217 dynamics, *sensu* May (1976). The lack of control for these situations may result in a  
218 dramatic rate of host infection, and an eventual collapse of the host-parasite interaction  
219 in a given population, depending on the amount of susceptible, infected and recovered  
220 events. Nonetheless, if the population is split into deme-cities, in a metapopulation  
221 structure, the collapse takes longer, and a much greater amount of people in different  
222 locations may eventually be infected, as found in our model. It is worthwhile to mention  
223 that this model, already pessimistic, did not consider the road network, one of the  
224 largest on the planet. Most importantly, the best road-connected cities are exactly those  
225 mostly connected by airport, and that will be vulnerable earlier, thus, probably spreading  
226 the disease faster than our model can predict, unless roads are soon blocked for  
227 people. Another weakness of the model is that it cannot quantify a great number of  
228 small airports not registered for commercial flights, very common in the Amazonian and  
229 Western regions. Taking this into a global scale, for a highly interconnected human  
230 population, the consequences may be catastrophic, as it was for the influenza pandemic  
231 (Spanish flu) in 1918 (Ferguson et al. 2003). Furthermore, one aspect that must not be  
232 neglected is the way as an increasing number of infected people in a city drive the  
233 pandemic towards the next city or country. In this context, the complex and large flight

234 network of Brazil, which is also key for the whole Latin America, if not properly  
235 monitored and controlled, may cause a window of opportunity for the virus to spread  
236 over the entire continent.

237         The consequences of this uncontrolled SARS-Cov-2 spreading is particularly  
238 serious if one takes into consideration the chances of a mutant virulent strain appearing  
239 and spreading into poorer and little monitored places of the world. Specifically, for the  
240 Amazon region, the lack of any control will make the city of Manaus a very sensitive  
241 cluster for public health, due to predominantly poor and indigenous-dominated cities in  
242 the region, which are connected to Manaus and will be rapidly infected. Reaching  
243 isolated regions means reaching indigenous or traditional communities, whose  
244 individuals are classically more susceptible to new pathogens than western-influenced  
245 or mixed urban populations. Therefore, a way to prevent such spreading, if still there is  
246 time, would be to deal with airports as entrances that need severe infection barriers.

247

## 248 **Conclusions**

249         The eventual lesson to take is that inflexible, severe, and easy to repeat  
250 controlling protocols must be applied to all the cities with airports. Likewise, the follow-  
251 up monitoring of suspicious individuals and their living network should be reinforced as  
252 a national strategy to prevent a large territory to be taken over by a pandemic in a short  
253 period of time. In other words, internationally accepted procedures must be taken and  
254 even be reviewed to adjust to complex national flight networks of any country. Such  
255 procedures must be considered as a priority for national remote airports too, in order to  
256 keep poorer and worse equipped cities away from a rapid spread of a pandemic  
257 disease.

258         It is clear at this point that a fast spread of the SARS-CoV-2 is a reality in Brazil,  
259 and across most of the country. We proposed this model in order to emphasize the  
260 fragility of Brazilian surveillance in the airport network, in an attempt to cause some  
261 policy change in time to preserve at least the most remote regions, which are also the  
262 most vulnerable, with a weaker health service. Moreover, most of the Eastern part of the  
263 country must stay in social isolation in order to prevent a health public collapse by mid-  
264 April, as the Ministry of Health predicted. In addition, we also could consider the  
265 generalized poverty of Brazil as a further problem our model did not deal with. The  
266 chances to produce home-to-home isolation, even legally imposed, is impossible for  
267 these poor communities. Nonetheless, considering the few main entrances of most of  
268 the Brazilian shanty towns and communities, a similar to airport entrance severe control  
269 must be considered to protect a larger but closely connected set of people, eventually  
270 following the protocols used for control of Ebola during the last epidemic in Africa (Lau  
271 et al. 2017).

272

## 274 **Acknowledgements**

275 We thank Christina Vinson and Thomas C.A. Williams for the English revision.  
276 CNPq agency guarantee research grant scholarship to SPR, ABR, AGN, ACJA, GWF  
277 and VAA.

278  
279  
280

## 281 **References**

- 282 Anderson, R.M. 1991. Discussion: the Kermack-McKendrick epidemic threshold  
283 theorem. *Bulletin of mathematical biology*, **53**:1–32.
- 284 Bedford, J. et al. 2020. Lancet COVID-19: towards controlling of a pandemic. *The*  
285 *Lancet* 10.1016/S0140-6736(20)30673-5
- 286 Ferguson, N.M., Alizon, P., Bush, R.M. 2003. Ecological and immunological  
287 determinants of influenza evolution. *Nature*, **422**: 428-433.
- 288 Hellewell, J. Abbott, S., Gimma, A., Bosse, N.I., Jarvis, C.I., Russell, T.W., Munday,  
289 J.D., Kucharski, A.J. 2020. Feasibility of controlling COVID-19 outbreaks by  
290 isolation of cases and contacts. *The Lancet* **28**, 10.1016/S2214-109X(20)30074-7.
- 291 Hethcote, H.W. 1989. Three basic epidemiological models. *Applied Mathematical*  
292 *Ecology*, **18**:119–144.
- 293 Lau, M.S.Y., Dalziel, B.D., Funk, S., McClelland, A., Tiffany, A., Riley, S., Jessica, C.,  
294 Metcalf. E., Grenfell, B.T. 2017. Spatial and temporal dynamics of superspreading  
295 events in the 2014–2015 West Africa Ebola epidemic. *PNAS* **114**, 2337-2342.
- 296 May, R.M. 1976. Simple mathematical models with very complicated dynamics. *Nature*,  
297 **261**: 459-467.
- 298 Morse, S.S., Mazet, J.A.K., Woolhouse, M., Parrish, C.R., Carroll, D., Karesh, W.D.,  
299 Zambrana-Torrel, C, Lipkin, W.L., Daszak, P. 2012. Prediction and prevention of  
300 the next pandemic zoonosis. *The Lancet* **380**, 1956-1965.
- 301 Pianka, E.R. 2000. *Evolutionary Ecology*, 6<sup>th</sup> Edition. Addison Wesley Longman ed, San  
302 Francisco.
- 303 Rothe C., Schunk M., Sothmann P., et al. 2020. Transmission of 2019-nCoV  
304 infection from an asymptomatic contact in Germany. *New England Journal of*  
305 *Medicine*, **382**: 970–71.
- 306 <http://plataforma.saude.gov.br/novocoronavirus/>  
307 <http://www.aai.aero/allAirports/airports.jsp>  
308 <http://www.infraero.gov.br/aero.php>  
309 <http://www.turismo.gov.br/>  
310 <https://gisanddata.maps.arcgis.com/>  
311 <https://www.anac.gov.br/>  
312 <https://www.faan.gov.ng/>



314 Figure 1 – Brazilian flight network, taken from ANAC database.

315

316 Figure 2 – Proportion of infected population of each Brazilian city in 40, 50, 70, and 90  
317 days. Circle colour temperature represents a gradient in percentage of the infected  
318 population. Circle size also reflects the size of the pandemics locally in the logarithm  
319 scale.

320

321 Figure 3 – Proportion of infected people per cities until 90 days. A) Cumulative increment  
322 rate. The blue line is the national average, and the shadow area is the summing up of  
323 minimum and maximum values of all the cities per time interval; B) Daily increment rate.  
324 The blue line is the average, showing the overall high rate of infection occurring from 50  
325 to 80 days. Shadow shows the first and the highest peak in the hub cities, around 50  
326 days, and, subsequently, a peripheric peak after 75 days.

327

328 Figure 4 – Airport closeness centrality within the Brazilian air transportation network,  
329 and its effect on the vulnerability of each city (represented by the average of the  
330 percentage of cases per city for the whole 90 days running:  $r^2 = 0.71$   $p < 0.00001$ ).

331

332 Supplementary Material 1 – Code description - SIR model under network topology.

333 The code was developed in C, and it works as a modification of SIR model running along with  
334 the topology of the domestic flight network. After initiating all variables to an initial condition, that  
335 is, S (health), I (infected) and R (recovered) of each city, the code starts loading the network  
336 and calculates the total number of flights among all the cities. This information is used to feed  
337 the classical SIR model introducing in the variable I, the information regarding infected travelers  
338 and non-travelers, and the model calculates the next S, I and R of all the cities. This calculation  
339 is done in a loop time representing days, the time step that the model was calibrated.

340

341 Supplementary Material 2 – ANAC database of aerial transportation network.

342 The spreadsheet presents all the 120 cities with airport(s), their state, latitude and  
343 longitude, followed by the closeness centrality in the network. The columns t0 to t90 are  
344 the times from 0 to 90 days. Lines for the time columns are the percentage of infected  
345 people per city per time.

346

347 Supplementary Material 3 – Movie of the spreading of SARS-CoV-2.

348 This file has a short movie describing the dynamics of SARS-Cov-2 dissemination  
349 across Brazil, in two versions.

350

Figure 1

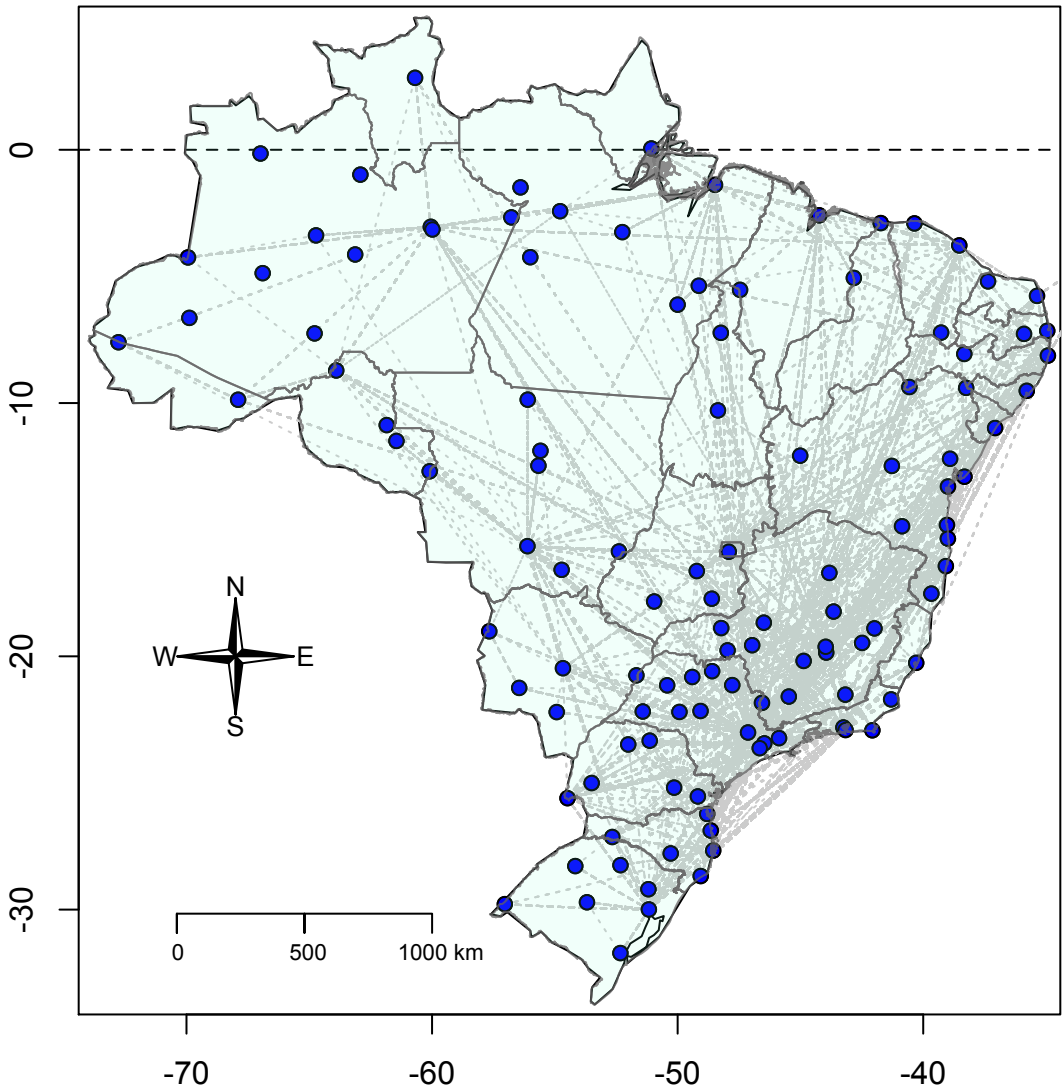

Figure 2

*Initial reports of COVID-19 in Brazil*

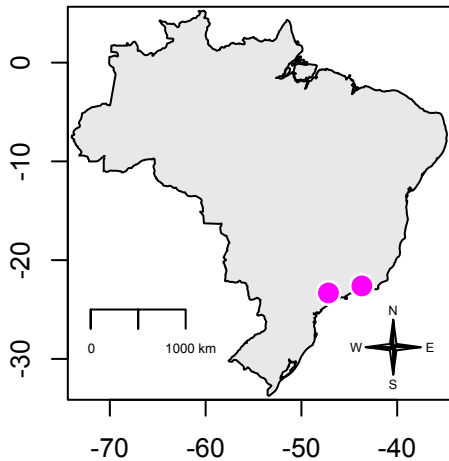

*Day 60*

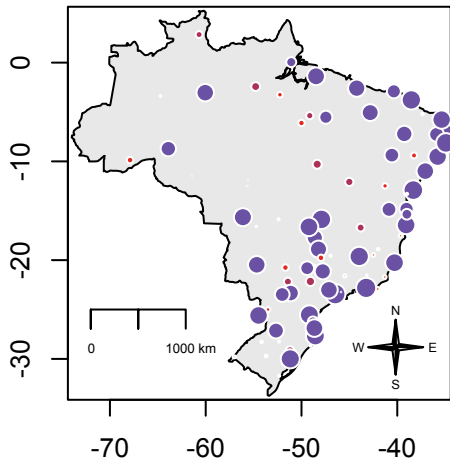

Vulnerability to COVID-19

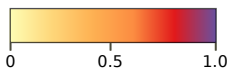

*Day 75*

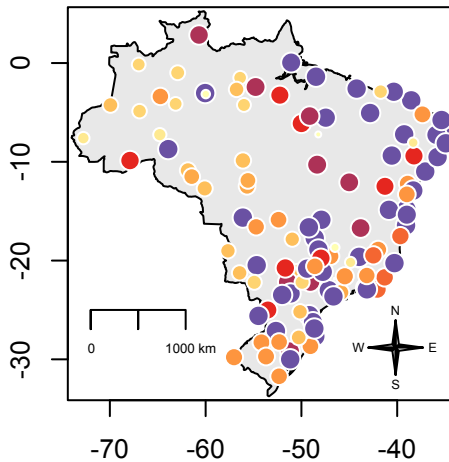

*Day 90*

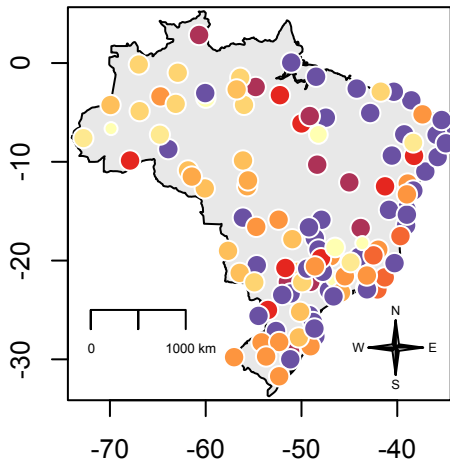

Figure 3

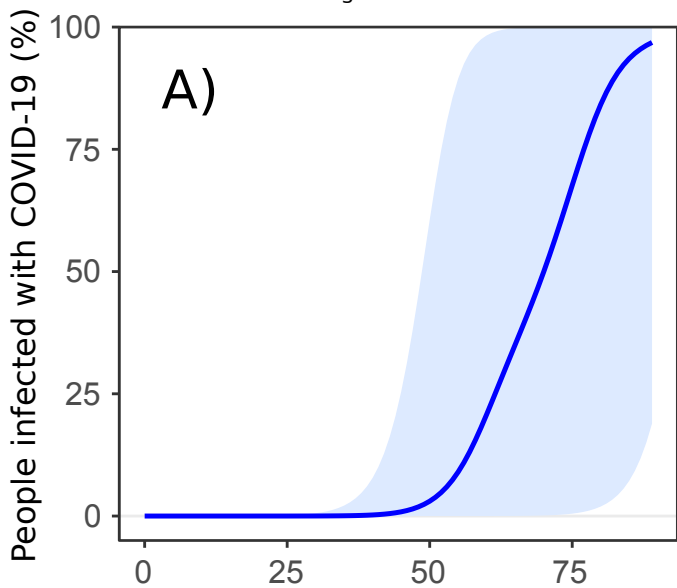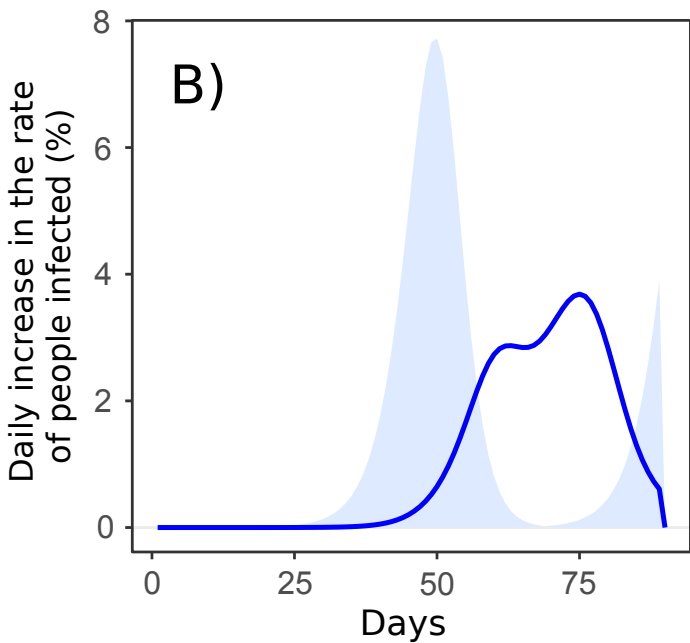

Figure 4

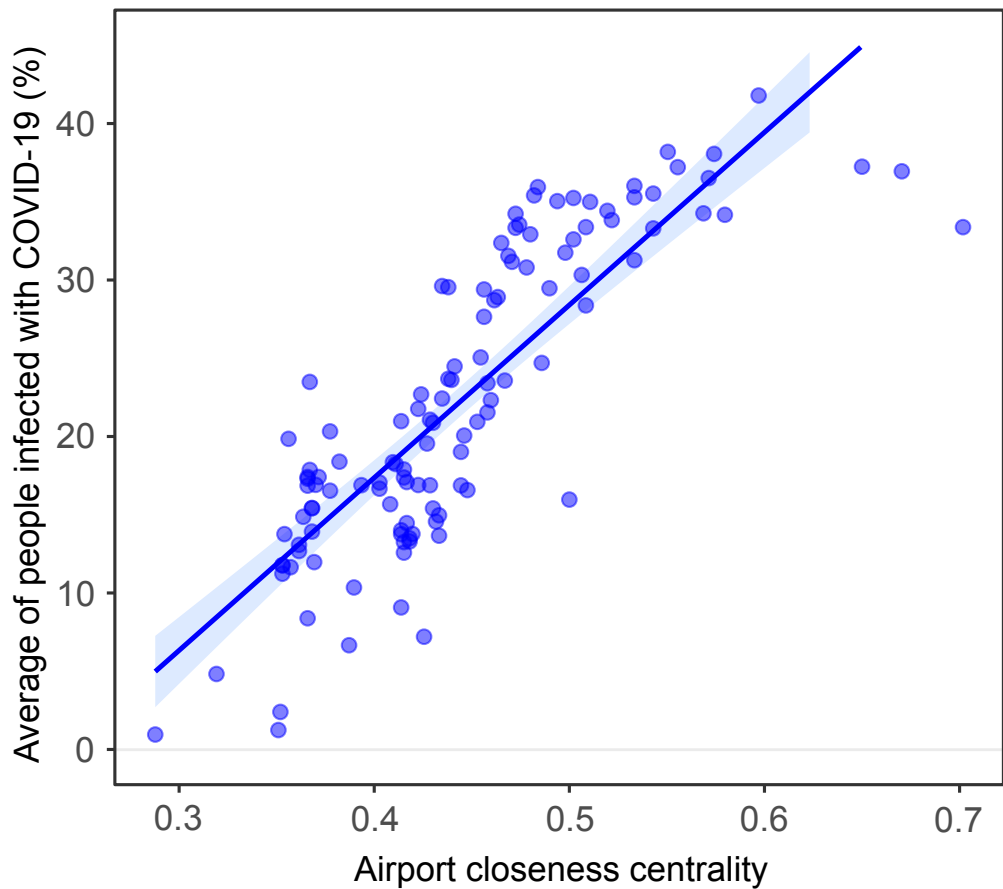

Source: https://medrxiv.org/content/medrxiv/early/2020/03/30/2020.03.26.20044370.full.pdf
